# Supplementary figures and images for: Conversion of 5-hydroxymethylfurfural into 5-ethoxymethylfurfural and ethyl levulinate catalyzed by MOF-based heteropolyacid materials
Source: Royal Society of Chemistry journal article supplement (doi:10.1039/c6gc01206j), 2016-01-01

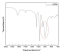

Supplement: c6gc01206j1.pdf [file c6gc01206j1.pdf]

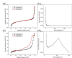

Supplement: c6gc01206j2.pdf [file c6gc01206j2.pdf]

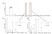

Supplement: c6gc01206j3.pdf [file c6gc01206j3.pdf]

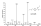

Supplement: c6gc01206j4.pdf [file c6gc01206j4.pdf]

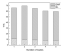

Supplement: c6gc01206j5.pdf [file c6gc01206j5.pdf]
